# Supplementary material for: Comprehensive 3D epigenomic maps define limbal stem/progenitor cell function and identity
Source: PubMed Central journal article supplement (PMC8917218; doi:10.1038/s41467-022-28966-6), 2022-03-11
Supplement: 41467_2022_28966_MOESM2_ESM.pdf [file 41467_2022_28966_MOESM2_ESM.pdf]

## Reporting Summary

Nature Portfolio wishes to improve the reproducibility of the work that we publish. This form provides structure for consistency and transparency in reporting. For further information on Nature Portfolio policies, see our [Editorial Policies](#) and the [Editorial Policy Checklist](#).

### Statistics

For all statistical analyses, confirm that the following items are present in the figure legend, table legend, main text, or Methods section.

n/a Confirmed

- The exact sample size ( $n$ ) for each experimental group/condition, given as a discrete number and unit of measurement
- A statement on whether measurements were taken from distinct samples or whether the same sample was measured repeatedly
- The statistical test(s) used AND whether they are one- or two-sided  
*Only common tests should be described solely by name; describe more complex techniques in the Methods section.*
- A description of all covariates tested
- A description of any assumptions or corrections, such as tests of normality and adjustment for multiple comparisons
- A full description of the statistical parameters including central tendency (e.g. means) or other basic estimates (e.g. regression coefficient) AND variation (e.g. standard deviation) or associated estimates of uncertainty (e.g. confidence intervals)
- For null hypothesis testing, the test statistic (e.g.  $F$ ,  $t$ ,  $r$ ) with confidence intervals, effect sizes, degrees of freedom and  $P$  value noted  
*Give  $P$  values as exact values whenever suitable.*
- For Bayesian analysis, information on the choice of priors and Markov chain Monte Carlo settings
- For hierarchical and complex designs, identification of the appropriate level for tests and full reporting of outcomes
- Estimates of effect sizes (e.g. Cohen's  $d$ , Pearson's  $r$ ), indicating how they were calculated

*Our web collection on [statistics for biologists](#) contains articles on many of the points above.*

### Software and code

Policy information about [availability of computer code](#)

|                 |                                                                                                                                                                                                                                                                                                                                                                                                                                                        |
|-----------------|--------------------------------------------------------------------------------------------------------------------------------------------------------------------------------------------------------------------------------------------------------------------------------------------------------------------------------------------------------------------------------------------------------------------------------------------------------|
| Data collection | Sequencing data was obtained from the HiSeq X Ten and NovaSeq 6000 systems (Illumina).                                                                                                                                                                                                                                                                                                                                                                 |
| Data analysis   | trimmomatic tool (version 0.36), BWA (version 0.7.17), MACS2 (version 2.1.1), HOMER (v4.9.1), deepTools (v3.0.2), clusterprofiler (v3.8.1), ICE software package (version 1f8815d0cc9e), 3DChromatinReplicateQC (v 0.0.1), Ay's Fit-Hi-C software (v1.0.1), ChromHMM (version 1.22), Intervene (version 0.5.8), Metascape (version 1.0), Picard Markduplicates (version 2.18.16), Integrative Genomics Viewer (version 2.4.13) and ROSE (version 1.0). |

For manuscripts utilizing custom algorithms or software that are central to the research but not yet described in published literature, software must be made available to editors and reviewers. We strongly encourage code deposition in a community repository (e.g. GitHub). See the Nature Portfolio [guidelines for submitting code & software](#) for further information.

### Data

Policy information about [availability of data](#)

All manuscripts must include a [data availability statement](#). This statement should provide the following information, where applicable:

- Accession codes, unique identifiers, or web links for publicly available datasets
- A description of any restrictions on data availability
- For clinical datasets or third party data, please ensure that the statement adheres to our [policy](#)

All data supporting the findings of this study are available within the paper and its supplementary information file. Previously published data of RNA-Seq, ATAC-Seq and ChIP-Seq for H3K27ac, H3K4me1, H3K4me3, H3K27me3, RUNX1, PAX6 and SMAD3 are available at the Gene Expression Omnibus repository under the accession number GSE156273 and GSE155773. H3K27me3 ChIP-Seq data for IMR-90 (ENCSR431UUU) and myotube (ENCSR000ATI) were downloaded from Encyclopedia of DNA Elements. The previously published H3K27ac ChIP-seq data of head and neck squamous cell carcinoma and esophageal squamous cell

## Field-specific reporting

Please select the one below that is the best fit for your research. If you are not sure, read the appropriate sections before making your selection.

- Life sciences       Behavioural & social sciences       Ecological, evolutionary & environmental sciences

For a reference copy of the document with all sections, see [nature.com/documents/nr-reporting-summary-flat.pdf](https://nature.com/documents/nr-reporting-summary-flat.pdf)

## Life sciences study design

All studies must disclose on these points even when the disclosure is negative.

|                 |                                                                                                                                                                                                                                                                                                                                                                                                                                                                                                |
|-----------------|------------------------------------------------------------------------------------------------------------------------------------------------------------------------------------------------------------------------------------------------------------------------------------------------------------------------------------------------------------------------------------------------------------------------------------------------------------------------------------------------|
| Sample size     | Chromosome Conformation Capture (3C) experiment was performed in triplicate and the next-generation sequencing experiments were performed in two replicates, which is sufficient to determine reproducible results based on extensive experience and is widely accepted. No statistical methods were used to determine sample sizes. All the sample sizes of sequencing data were based on standard sequencing analysis practices and were determined to be suitable for statistical analyses. |
| Data exclusions | No data were excluded.                                                                                                                                                                                                                                                                                                                                                                                                                                                                         |
| Replication     | Hi-C and ChIP-seq experiments were performed for 2 biological replicates and 3C experiment was conducted for three biological replicates.                                                                                                                                                                                                                                                                                                                                                      |
| Randomization   | This study does not involve work that requires random allocation because all experiments are performed in one cell type and no comparisons between experimental groups were made.                                                                                                                                                                                                                                                                                                              |
| Blinding        | Blinding was not relevant to this study, because all experiments were conducted on cell cultures without human or animal subjectivity                                                                                                                                                                                                                                                                                                                                                          |

## Reporting for specific materials, systems and methods

We require information from authors about some types of materials, experimental systems and methods used in many studies. Here, indicate whether each material, system or method listed is relevant to your study. If you are not sure if a list item applies to your research, read the appropriate section before selecting a response.

### Materials & experimental systems

| n/a                                 | Involved in the study                                           |
|-------------------------------------|-----------------------------------------------------------------|
| <input type="checkbox"/>            | <input checked="" type="checkbox"/> Antibodies                  |
| <input checked="" type="checkbox"/> | <input type="checkbox"/> Eukaryotic cell lines                  |
| <input checked="" type="checkbox"/> | <input type="checkbox"/> Palaeontology and archaeology          |
| <input checked="" type="checkbox"/> | <input type="checkbox"/> Animals and other organisms            |
| <input type="checkbox"/>            | <input checked="" type="checkbox"/> Human research participants |
| <input checked="" type="checkbox"/> | <input type="checkbox"/> Clinical data                          |
| <input checked="" type="checkbox"/> | <input type="checkbox"/> Dual use research of concern           |

### Methods

| n/a                                 | Involved in the study                           |
|-------------------------------------|-------------------------------------------------|
| <input type="checkbox"/>            | <input checked="" type="checkbox"/> ChIP-seq    |
| <input checked="" type="checkbox"/> | <input type="checkbox"/> Flow cytometry         |
| <input checked="" type="checkbox"/> | <input type="checkbox"/> MRI-based neuroimaging |

## Antibodies

|                 |                                                                                                                                                                                                                                                                                                                                                                                                                                                                                                                                                                                                                                                                                                                                                                                                                                                                                                                                                                                                                                                                                                                                                                                                                                                                                                                                                 |
|-----------------|-------------------------------------------------------------------------------------------------------------------------------------------------------------------------------------------------------------------------------------------------------------------------------------------------------------------------------------------------------------------------------------------------------------------------------------------------------------------------------------------------------------------------------------------------------------------------------------------------------------------------------------------------------------------------------------------------------------------------------------------------------------------------------------------------------------------------------------------------------------------------------------------------------------------------------------------------------------------------------------------------------------------------------------------------------------------------------------------------------------------------------------------------------------------------------------------------------------------------------------------------------------------------------------------------------------------------------------------------|
| Antibodies used | Antibodies used for ChIP-seq (10µg/ChIP): p63 (CST, 13109), CTCF (Millipore, 07-729), SMC1 (Bethyl Laboratories, A300-055A), EP300 (Abcam, ab14984) and H3K9me2 (Abcam, ab1220)                                                                                                                                                                                                                                                                                                                                                                                                                                                                                                                                                                                                                                                                                                                                                                                                                                                                                                                                                                                                                                                                                                                                                                 |
| Validation      | Antibodies used in our study were validated as noted by suppliers. Antibody validation information and relevant citations can be found on manufacturers' website.<br>p63: <a href="https://www.cellsignal.cn/products/primary-antibodies/p63-a-d2k8x-xp-rabbit-mab/13109?site-search-type=Products&amp;N=4294956287&amp;Ntt=13109&amp;fromPage=plp&amp;_requestid=752781">https://www.cellsignal.cn/products/primary-antibodies/p63-a-d2k8x-xp-rabbit-mab/13109?site-search-type=Products&amp;N=4294956287&amp;Ntt=13109&amp;fromPage=plp&amp;_requestid=752781</a><br>CTCF: <a href="https://www.sigmaaldrich.cn/CN/zh/product/mm/07729">https://www.sigmaaldrich.cn/CN/zh/product/mm/07729</a><br>SMC1: <a href="https://www.biomol.com/products/antibodies/primary-antibodies/general/anti-smc1-a300-055a-t?number=A300-055A">https://www.biomol.com/products/antibodies/primary-antibodies/general/anti-smc1-a300-055a-t?number=A300-055A</a><br>EP300: <a href="https://www.abcam.cn/kat3b-p300-antibody-3g230-nm-11-chip-grade-ab14984.html">https://www.abcam.cn/kat3b-p300-antibody-3g230-nm-11-chip-grade-ab14984.html</a><br>H3K9me2: <a href="https://www.abcam.cn/histone-h3-di-methyl-k9-antibody-mabcam-1220-chip-grade-ab1220.html">https://www.abcam.cn/histone-h3-di-methyl-k9-antibody-mabcam-1220-chip-grade-ab1220.html</a> |

## Human research participants

Policy information about [studies involving human research participants](#)

|                            |                                                                                                                                               |
|----------------------------|-----------------------------------------------------------------------------------------------------------------------------------------------|
| Population characteristics | All human limbus tissues were obtained from four male donors aged from 20 to 46. These donors do not have any ocular surface diseases.        |
| Recruitment                | This study did not involve recruitment of patients. Normal human limbus of donors were obtained from eye bank of Zhongshan Ophthalmic Center. |
| Ethics oversight           | All human tissues were obtained with the approval of the Ethics Committee of Zhongshan Ophthalmic Center of Sun Yat-sen University.           |

Note that full information on the approval of the study protocol must also be provided in the manuscript.

## ChIP-seq

### Data deposition

- Confirm that both raw and final processed data have been deposited in a public database such as [GEO](#).
- Confirm that you have deposited or provided access to graph files (e.g. BED files) for the called peaks.

|                                                                    |                                                                                                                                                                                                                                                                                                                                                                                                                                                                                                                                                                        |
|--------------------------------------------------------------------|------------------------------------------------------------------------------------------------------------------------------------------------------------------------------------------------------------------------------------------------------------------------------------------------------------------------------------------------------------------------------------------------------------------------------------------------------------------------------------------------------------------------------------------------------------------------|
| Data access links<br><i>May remain private before publication.</i> | <a href="https://www.ncbi.nlm.nih.gov/geo/query/acc.cgi?acc=GSE156273">https://www.ncbi.nlm.nih.gov/geo/query/acc.cgi?acc=GSE156273</a><br><a href="https://www.ncbi.nlm.nih.gov/geo/query/acc.cgi?acc=GSE88976">https://www.ncbi.nlm.nih.gov/geo/query/acc.cgi?acc=GSE88976</a><br><a href="https://www.ncbi.nlm.nih.gov/geo/query/acc.cgi?acc=GSE106433">https://www.ncbi.nlm.nih.gov/geo/query/acc.cgi?acc=GSE106433</a><br><a href="https://www.ncbi.nlm.nih.gov/geo/query/acc.cgi?acc=GSE192625">https://www.ncbi.nlm.nih.gov/geo/query/acc.cgi?acc=GSE192625</a> |
| Files in database submission                                       | H3K27ac_rep1<br>H3K27ac_rep2<br>H3K4me1_rep1<br>H3K4me1_rep2<br>H3K4me3_rep1<br>H3K4me3_rep2<br>H3K27me3_rep1<br>H3K27me3_rep2<br>RUNX1_rep1<br>RUNX1_rep2<br>PAX6_rep1<br>PAX6_rep2<br>SMAD3_rep1<br>SMAD3_rep2<br>H3K9me2_rep1<br>H3K9me2_rep2<br>CTCF_rep1<br>CTCF_rep2<br>SMC1_rep1<br>SMC1_rep2<br>EP300_rep1<br>EP300_rep2<br>p63_rep1<br>p63_rep2<br>H3K27ac-BICR16<br>H3K27ac-HSC4<br>H3K27ac-Detroit562<br>KYSE140_H3K27Ac<br>KYSE510_H3K27Ac<br>KYSE70_H3K27Ac                                                                                               |
| Genome browser session<br>(e.g. <a href="#">UCSC</a> )             | GSE156273, GSE88976, GSE106433 and GSE192625                                                                                                                                                                                                                                                                                                                                                                                                                                                                                                                           |

### Methodology

|                  |                                                                                                                                                                      |
|------------------|----------------------------------------------------------------------------------------------------------------------------------------------------------------------|
| Replicates       | Two independent experimental replications were performed.                                                                                                            |
| Sequencing depth | 6Gb paired-end data were generated.                                                                                                                                  |
| Antibodies       | Antibodies used in this work: p63 (CST, 13109), CTCF (Millipore, 07-729), SMC1 (Bethyl Laboratories, A300-055A), EP300 (Abcam, ab14984) and H3K9me2 (Abcam, ab1220). |

Peak calling parameters

`-f BAMPE -B --SPMR -q 0.001 --call-summits --fix-bimodal --seed 11521 --extsize 200`

Data quality

FastQC(v0.11.8) was used to assess the data quality

Software

trimmomatic tool (version 0.36), BWA (version 0.7.17), MACS2 (version 2.1.1), deepTools (v3.0.2), HOMER (v4.9.1),
